# Supplementary material for: ExoSTING, an extracellular vesicle loaded with STING agonists, promotes tumor immune surveillance
Source: PubMed Central journal article supplement (PMC8062530; doi:10.1038/s42003-021-02004-5), 2021-04-22
Supplement: 42003_2021_2004_MOESM5_ESM.pdf [file 42003_2021_2004_MOESM5_ESM.pdf]

## Reporting Summary

Nature Research wishes to improve the reproducibility of the work that we publish. This form provides structure for consistency and transparency in reporting. For further information on Nature Research policies, see our [Editorial Policies](#) and the [Editorial Policy Checklist](#).

### Statistics

For all statistical analyses, confirm that the following items are present in the figure legend, table legend, main text, or Methods section.

n/a Confirmed

- |                                     |                                     |                                                                                                                                                                                                                                                            |
|-------------------------------------|-------------------------------------|------------------------------------------------------------------------------------------------------------------------------------------------------------------------------------------------------------------------------------------------------------|
| <input type="checkbox"/>            | <input checked="" type="checkbox"/> | The exact sample size ( $n$ ) for each experimental group/condition, given as a discrete number and unit of measurement                                                                                                                                    |
| <input type="checkbox"/>            | <input checked="" type="checkbox"/> | A statement on whether measurements were taken from distinct samples or whether the same sample was measured repeatedly                                                                                                                                    |
| <input type="checkbox"/>            | <input checked="" type="checkbox"/> | The statistical test(s) used AND whether they are one- or two-sided<br><i>Only common tests should be described solely by name; describe more complex techniques in the Methods section.</i>                                                               |
| <input type="checkbox"/>            | <input checked="" type="checkbox"/> | A description of all covariates tested                                                                                                                                                                                                                     |
| <input checked="" type="checkbox"/> | <input type="checkbox"/>            | A description of any assumptions or corrections, such as tests of normality and adjustment for multiple comparisons                                                                                                                                        |
| <input type="checkbox"/>            | <input checked="" type="checkbox"/> | A full description of the statistical parameters including central tendency (e.g. means) or other basic estimates (e.g. regression coefficient) AND variation (e.g. standard deviation) or associated estimates of uncertainty (e.g. confidence intervals) |
| <input type="checkbox"/>            | <input checked="" type="checkbox"/> | For null hypothesis testing, the test statistic (e.g. $F$ , $t$ , $r$ ) with confidence intervals, effect sizes, degrees of freedom and $P$ value noted<br><i>Give <math>P</math> values as exact values whenever suitable.</i>                            |
| <input checked="" type="checkbox"/> | <input type="checkbox"/>            | For Bayesian analysis, information on the choice of priors and Markov chain Monte Carlo settings                                                                                                                                                           |
| <input checked="" type="checkbox"/> | <input type="checkbox"/>            | For hierarchical and complex designs, identification of the appropriate level for tests and full reporting of outcomes                                                                                                                                     |
| <input checked="" type="checkbox"/> | <input type="checkbox"/>            | Estimates of effect sizes (e.g. Cohen's $d$ , Pearson's $r$ ), indicating how they were calculated                                                                                                                                                         |

*Our web collection on [statistics for biologists](#) contains articles on many of the points above.*

### Software and code

Policy information about [availability of computer code](#)

Data collection

Flow cytometry data was collected using Cyto Flex LX (Beckman Coulter) or SA3800 (Sony). SDS-PAGE and Western blot data were collected using Compass Software (v. 3.1.8, Protein Simple) or Image Lab (v. 6.0.1, BioRad). Particle counting was performed using Nanosight NTA software (v. 3.4, Malvern Panalytical). Elispot data was acquired using Elispot Reader software (v. 7.0, Autoimmun Diagnostika GMBH). Nanostring data was acquired using nCounter Sprint Profiler (Nanostring). qPCR data was acquired using QuantStudio™ 3 & 5 Real-Time PCR System (Thermo Fisher Scientific). Binding of PTGFRN and Siglec proteins were measured by using Protein A biosensors (ForteBio).

Data analysis

Statistical analyses and graph generation were performed using Prism (v. 8.1, Graphpad). Flow cytometry data was processed using FlowJo (v. v10.6.1; Becton, Dickinson & Company) or FCS Express (v. 7, De Novo Software). Nanostring data was analyzed using nSolver Analysis Software (v 4.0, Nanostring). qPCR data was analyzed using QuantStudio™ Design & Analysis Software (v. 1.5.1 Thermo Fisher Scientific). Equilibrium dissociation constants were calculated for Siglec 9, 10, and 14 using ForteBio Data Analysis software v. 10.0.

For manuscripts utilizing custom algorithms or software that are central to the research but not yet described in published literature, software must be made available to editors and reviewers. We strongly encourage code deposition in a community repository (e.g. GitHub). See the Nature Research [guidelines for submitting code & software](#) for further information.

### Data

Policy information about [availability of data](#)

All manuscripts must include a [data availability statement](#). This statement should provide the following information, where applicable:

- Accession codes, unique identifiers, or web links for publicly available datasets
- A list of figures that have associated raw data
- A description of any restrictions on data availability

Data supporting the findings of this work are available within the paper and its Supplementary files. RNA sequencing data have been deposited to GEO with

## Field-specific reporting

Please select the one below that is the best fit for your research. If you are not sure, read the appropriate sections before making your selection.

- Life sciences     Behavioural & social sciences     Ecological, evolutionary & environmental sciences

For a reference copy of the document with all sections, see [nature.com/documents/nr-reporting-summary-flat.pdf](https://www.nature.com/documents/nr-reporting-summary-flat.pdf)

## Life sciences study design

All studies must disclose on these points even when the disclosure is negative.

|                 |                                                                                                                                                                                                                                                                                                                                      |
|-----------------|--------------------------------------------------------------------------------------------------------------------------------------------------------------------------------------------------------------------------------------------------------------------------------------------------------------------------------------|
| Sample size     | All experimental measurements were performed at least in duplicate, and where feasible, sample sizes are listed in the manuscript. All immune cells assays relied on multiple donors, and all animal studies used at least five animals per group.                                                                                   |
| Data exclusions | No data were excluded.                                                                                                                                                                                                                                                                                                               |
| Replication     | All attempts at replication were successful.                                                                                                                                                                                                                                                                                         |
| Randomization   | Mice were implanted with tumor cells until the tumors reached an average volume of 50-100mm <sup>3</sup> . Mice were randomized into groups such that the average tumor volume and variance of tumor volume between individual animals was as consistent as possible. Groups were treated as described in the materials and methods. |
| Blinding        | No experiments were blinded, since all animal study read outs were objective.                                                                                                                                                                                                                                                        |

## Reporting for specific materials, systems and methods

We require information from authors about some types of materials, experimental systems and methods used in many studies. Here, indicate whether each material, system or method listed is relevant to your study. If you are not sure if a list item applies to your research, read the appropriate section before selecting a response.

### Materials & experimental systems

| n/a                                 | Involvement in the study                                        |
|-------------------------------------|-----------------------------------------------------------------|
| <input type="checkbox"/>            | <input checked="" type="checkbox"/> Antibodies                  |
| <input type="checkbox"/>            | <input checked="" type="checkbox"/> Eukaryotic cell lines       |
| <input checked="" type="checkbox"/> | <input type="checkbox"/> Palaeontology and archaeology          |
| <input type="checkbox"/>            | <input checked="" type="checkbox"/> Animals and other organisms |
| <input checked="" type="checkbox"/> | <input type="checkbox"/> Human research participants            |
| <input checked="" type="checkbox"/> | <input type="checkbox"/> Clinical data                          |
| <input checked="" type="checkbox"/> | <input type="checkbox"/> Dual use research of concern           |

### Methods

| n/a                                 | Involvement in the study                           |
|-------------------------------------|----------------------------------------------------|
| <input checked="" type="checkbox"/> | <input type="checkbox"/> ChIP-seq                  |
| <input type="checkbox"/>            | <input checked="" type="checkbox"/> Flow cytometry |
| <input checked="" type="checkbox"/> | <input type="checkbox"/> MRI-based neuroimaging    |

## Antibodies

Antibodies used

Human anti-CD9 BioLegend 312102  
 Human anti-CD63 ThermoFisher 10628D  
 Human anti-CD81 ThermoFisher 10630D  
 Human anti-TSG101 BD Biosciences 612696  
 Human anti-Alix Abcam ab117600  
 Human anti-Calnexin Abcam ab22595  
 Human anti-PTGFRN LS-Bio LS-C158765  
 Anti-Adenovirus Type 5 E1A antibody Abcam ab204123  
 Rabbit anti-Mouse IgG HRP Abcam ab97046  
 Goat anti-Rabbit IgG HRP Abcam ab6721

Anti-mouse CD45 BUV395 BD Biosciences 564279  
 Anti-mouse CD3e BUV737 BD Biosciences 564618  
 Anti-mouse TCRb BUV737 BD Biosciences 564799  
 Anti-mouse CD11b APC BioLegend 101212  
 Anti-mouse CD8 BB700 BD Biosciences 566409  
 Anti-mouse Ly-6C PE-Cy7 BioLegend 128018  
 Anti-mouse I-A/I-E BV510 BioLegend 107635  
 Anti-mouse CD335 BV605 BioLegend 137619

Anti-mouse CD49b BV605 BD Biosciences 740363  
 Anti-mouse CD11c BV421 BioLegend 117330  
 Anti-mouse XCR1 APC BioLegend 148206  
 Anti-mouse F4/80 BV785 BioLegend 123141

Anti-mouse CD8 Abcam ab230156  
 Anti-mouse F4/80 Cell Signaling 70076s  
 Anti-mouse phospho TBK1 Cell Signaling 5483  
 Anti-mouse Cleaved caspase 3 Cell Signaling 9661

Anti-human CD69 PE-Cy7 BioLegend 310912  
 Anti-human CD86 APC BioLegend 305412  
 Anti-human CD11c BV421 BioLegend 301628  
 Anti-human CD1C BV711 BioLegend 331536  
 Anti-human CD14 BV605 BioLegend 367126  
 Anti-human CD123 BV785 BioLegend 306032  
 Anti-human CD141 PE-Cy7 BioLegend 344110  
 Anti-human CD3 BUV395 BD Biosciences 564117  
 Anti-human CD19 APC BioLegend 302212  
 Anti-human CD20 BUV737 BD Biosciences 564432  
 Anti-human CD16 PE-Cy7 BioLegend 302016  
 Anti-human CD56 PerCP-Cy5.5 BioLegend 318326  
 Anti-human HLADR PE BioLegend 307606

Validation All antibodies were validated by the manufacturer, when applicable. PTGFRN antibodies were validated against recombinant PTGFRN by biolayer interferometry and by testing against PTGFRN knock out samples.

## Eukaryotic cell lines

Policy information about [cell lines](#)

|                                                                      |                                                                                                                                                                          |
|----------------------------------------------------------------------|--------------------------------------------------------------------------------------------------------------------------------------------------------------------------|
| Cell line source(s)                                                  | HEK293SF cells were obtained under license from NRCC-CNRC. All other cell lines were obtained from ATCC.                                                                 |
| Authentication                                                       | All cell lines were authenticated by the vendor including tests for identity, species, and presence of pathogenic viruses. No additional authentication was carried out. |
| Mycoplasma contamination                                             | Cells were tested for Mycoplasma and were negative.                                                                                                                      |
| Commonly misidentified lines<br>(See <a href="#">ICLAC</a> register) | No commonly misidentified cell lines were used in this study.                                                                                                            |

## Animals and other organisms

Policy information about [studies involving animals](#); [ARRIVE guidelines](#) recommended for reporting animal research

|                         |                                                                                                                                                                                                                        |
|-------------------------|------------------------------------------------------------------------------------------------------------------------------------------------------------------------------------------------------------------------|
| Laboratory animals      | All mice used in the study were female C57BL/6 mice, female BALB/c mice, or female female BALB/cAnNHsd mice, aged five to ten weeks, that were obtained from Taconic, The Jackson Laboratory, or Envigo, respectively. |
| Wild animals            | No wild animals were used                                                                                                                                                                                              |
| Field-collected samples | No field-collected samples were used                                                                                                                                                                                   |
| Ethics oversight        | Codiak's internal IACUC and the Cambridge Animal Commissioner approved study protocols and provided guidance on the care and ethical treatment of all study animals.                                                   |

Note that full information on the approval of the study protocol must also be provided in the manuscript.

## Flow Cytometry

### Plots

Confirm that:

- The axis labels state the marker and fluorochrome used (e.g. CD4-FITC).
- The axis scales are clearly visible. Include numbers along axes only for bottom left plot of group (a 'group' is an analysis of identical markers).
- All plots are contour plots with outliers or pseudocolor plots.
- A numerical value for number of cells or percentage (with statistics) is provided.

## Methodology

|                           |                                                                                                                                                                                                              |
|---------------------------|--------------------------------------------------------------------------------------------------------------------------------------------------------------------------------------------------------------|
| Sample preparation        | Preparation of samples is detailed in the materials and methods.                                                                                                                                             |
| Instrument                | Beckman CytoFLEX and Sony SA3800                                                                                                                                                                             |
| Software                  | Flow cytometry data was collected using CytExpert (v. 2.3.0.84, Beckman Coulter) or SA3800 (v. 2.0.4.13263, Sony)                                                                                            |
| Cell population abundance | All measured cell populations were pure and abundant (>1% of analyzed population) as determined by the flow cytometry plots                                                                                  |
| Gating strategy           | All flow cytometry plots were gated on live single cells and all gating boundaries were based on unstained controls, isotype controls, and FMOs. See Supplemental Figure 17 for exemplary gating strategies. |

Tick this box to confirm that a figure exemplifying the gating strategy is provided in the Supplementary Information.
